# Supplementary material for: Depressive symptoms trajectories and chronic lung diseases in Chinese middle-aged and older adults: a longitudinal cohort study
Source: Research Square preprint supplement (doi:10.21203/rs.3.rs-7549674/v1), 2025-11-25
Supplement: Supplementary file 1 [file 56a160504683ba02b061003c.docx]

Depressive symptoms trajectories and chronic lung diseases in Chinese middle-aged and older adults: a longitudinal cohort study

**Table 1**. Fit statistics for drepressive sympetom group trajectories in middle-aged and older adults from CHARLS

| **Fit statistic** | **Number of classes** | | | | |
| --- | --- | --- | --- | --- | --- |
| **1** | **2** | **3** | **4** | **5** |
| BIC* | 162537.11 | 153686.89 | 151999.91 | 151877.61 | 151499.29 |
| AIC* | 162504.56 | 153613.65 | 151885.98 | 151731.12 | 151312.11 |
| App† |  | Class 1, 0.92 | Class 1, 0.85 | Class 1, 0.84 | Class 1, 0.76 |
|  |  | Class 2, 0.94 | Class 2, 0.84 | Class 2, 0.82 | Class 2, 0.79 |
|  |  |  | Class 3, 0.90 | Class 3, 0.60 | Class 3, 0.73 |
|  |  |  |  | Class 4, 0.88 | Class 4, 0.87 |
|  |  |  |  |  | Class 5, 0.63 |
| Class  Proportion& | Class 1, 100% | Class 1, 55.07% | Class 1, 26.02% | Class 1, 25.57% | Class 1, 8.23% |
|  | Class 2, 44.93% | Class 2, 47.43% | Class 2, 45.91% | Class 2, 34.11% |
|  |  |  | Class 3, 26.55% | Class 3, 4.33% | Class 3, 30.59% |
|  |  |  |  | Class 4, 24.19% | Class 4, 19.85% |
|  |  |  |  |  | Class 5, 7.21% |

CHARLS, China Health and Retirement Longitudinal Study; AIC, Akaike’s information criterion; BIC, Bayesian information criteria; APP, average posterior probabilities

* A lower absolute value suggests a better model fit

† A higher value is better (preferably >0.7 in a class)

& No less than 5% of total count in a class
